# Supplementary material for: Ca2+/calmodulin regulates Kvβ1.1-mediated inactivation of voltage-gated K+ channels
Source: PubMed Central journal article supplement (PMC4614385; doi:10.1038/srep15509), 2015-10-21
Supplement: srep15509-s1.pdf [file srep15509-s1.pdf]

## **Ca<sup>2+</sup>/calmodulin regulates Kvβ1.1-mediated inactivation of voltage-gated K<sup>+</sup> channels**

Sandip M. Swain<sup>1</sup>, Nirakar Sahoo<sup>1,2</sup>, Sophie Dennhardt<sup>1</sup>, Roland Schönherr<sup>1</sup>,  
and Stefan H. Heinemann<sup>1</sup>

<sup>1</sup>Center for Molecular Biomedicine, Department of Biophysics, Friedrich Schiller University  
Jena & Jena University Hospital, Hans-Knöll-Str. 2, D-07745 Jena, Germany,

<sup>2</sup>Present address: University of Michigan, Department of MCDB, 830 North University  
Avenue, Ann Arbor, MI 48109-1048, USA

Corresponding author:

Prof. Dr. Stefan H. Heinemann

Center for Molecular Biomedicine

Department of Biophysics

Friedrich Schiller University Jena & Jena University Hospital

Hans-Knöll-Str. 2

D-07745 Jena, Germany

Tel: ++49-3641-9 39 56 50

Fax: ++49-3641-9 39 56 52

E-Mail: Stefan.H.Heinemann@uni-jena.de

Running title: Ca<sup>2+</sup> dependence of Kvβ1.1

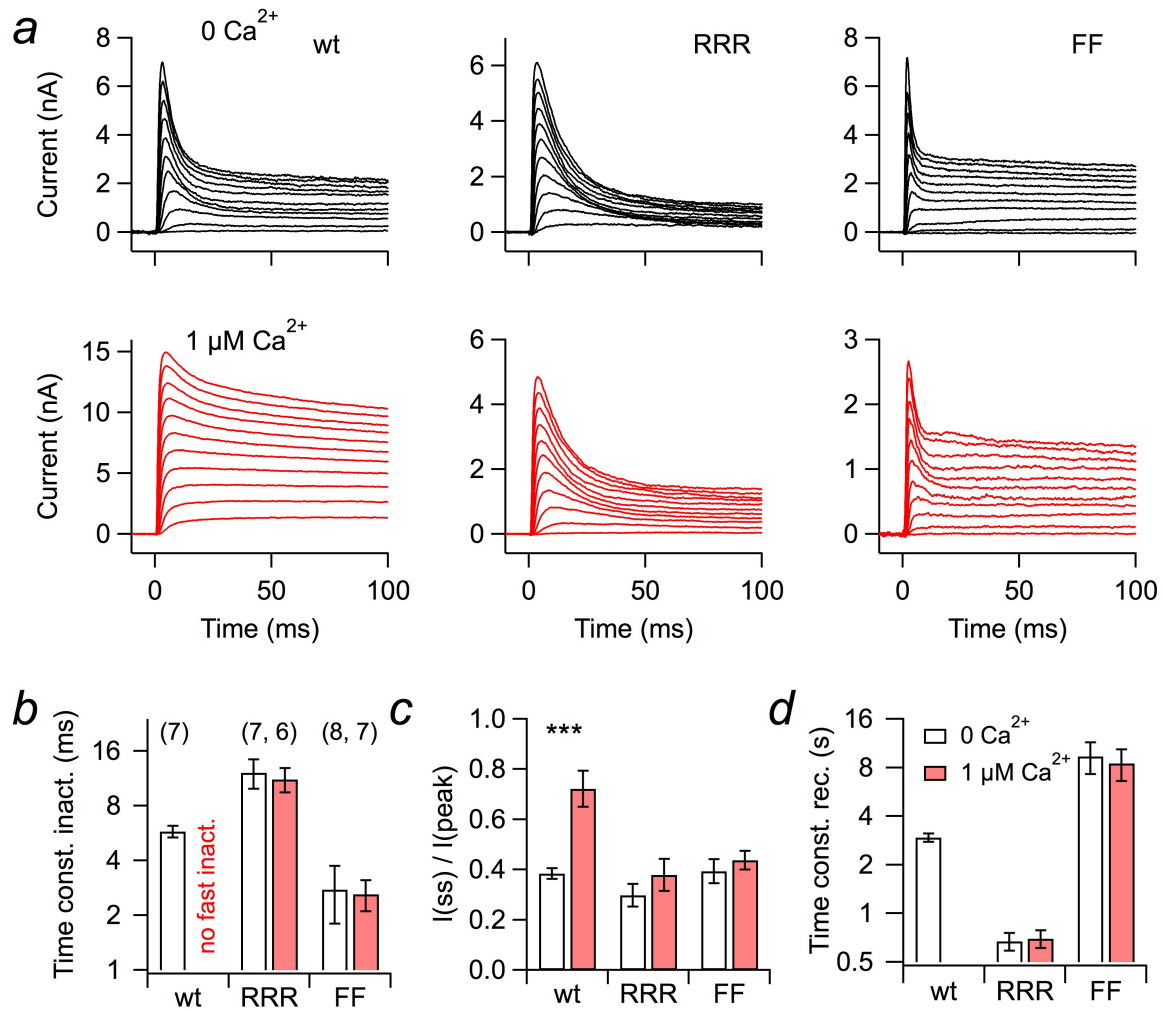

### Supplementary Figure 1 | Whole-cell recordings of Kv1.1 currents from HEK 293T

**cells.** Kv1.1 channels were coexpressed with Kvβ1.1 wild type (wt) or mutants RRR and FF in HEK 293T cells; currents were measured in the whole-cell mode. (a) Current traces upon depolarization to  $-40$  through  $60$  mV in steps of  $10$  mV from a holding voltage of  $-90$  mV for the indicated Kvβ1.1 constructs. For the top traces (black), the pipette solution contained  $10$  mM EGTA, thus the concentration of free Ca<sup>2+</sup> was negligible; for the bottom traces (red), free [Ca<sup>2+</sup>] was adjusted to  $1$  μM (in mM:  $140$  KCl,  $1.7$  CaCl<sub>2</sub>,  $10$  HEDTA,  $10$  HEPES, pH  $7.3$  with KOH). (b) Time constant of rapid inactivation at  $50$  mV without (white) and with Ca<sup>2+</sup> (red). (c) Ratio of remaining current after  $100$  ms at  $50$  mV and peak current. (d) Time constant of recovery from inactivation at  $-90$  mV. Data in b-d are mean  $\pm$  s.e.m. with  $n$  indicated in parentheses of panel b. Two-sided t-test: \*\*\*  $P < 0.001$ .

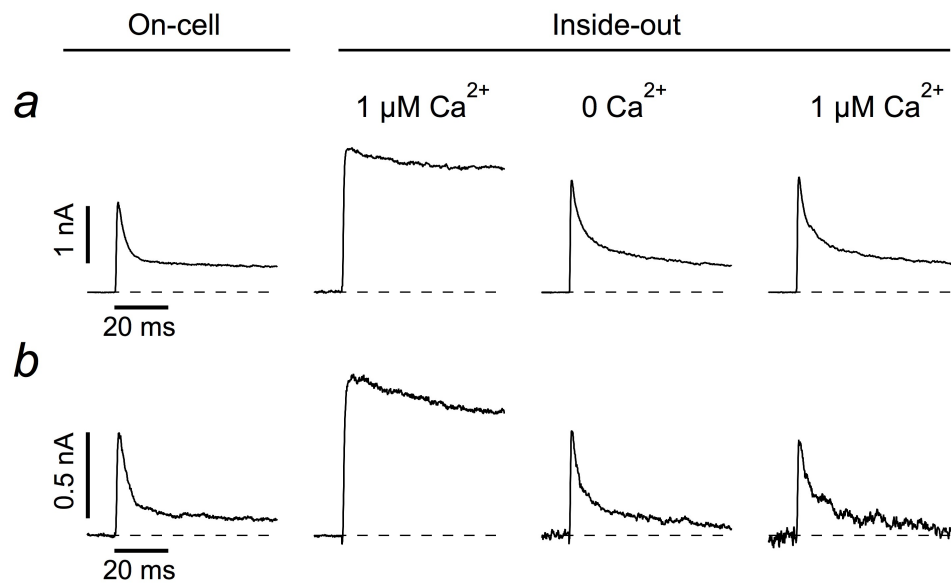

**Supplementary Figure 2 | Acutely excised patches retain some CaM to facilitate Ca<sup>2+</sup>-induced loss of Kvβ1.1-mediated inactivation.** (a, b) Two examples of current traces elicited with depolarizing steps to 50 mV of Kv1.1+Kvβ1.1 complexes expressed in *Xenopus* oocytes: on-cell mode followed by the inside-out configuration into bath solutions with the indicated concentration of free Ca<sup>2+</sup> and no extra calmodulin.
